# Supplementary material for: Cationic polymerization of isobutylene catalysed by AlCl3 with multiple nucleophilic reagents
Source: Royal Society of Chemistry journal article supplement (doi:10.1039/c6ra21983g), 2016-01-01
Supplement: c6ra21983g1.pdf [file c6ra21983g1.pdf]

## **Cationic Polymerization of Isobutylene Catalysed by $\text{AlCl}_3$ with Multiple Nucleophilic Reagents**

Shan Zhu, Yangcheng Lu,\* Kai Wang and Guangsheng Luo

*State Key Laboratory of Chemical Engineering, Department of Chemical Engineering, Tsinghua University, Beijing 100084, China*

Table S1. The end group distribution of the PIBs

| Entry <sup>a</sup> | End group distribution (mol %) |      |       |     |
|--------------------|--------------------------------|------|-------|-----|
|                    | exo                            | tri  | tetra | -Cl |
| 1                  | 30.5                           | 27.6 | 35.0  | 6.9 |
| 2                  | 60.4                           | 13.1 | 19.0  | 7.5 |
| 3                  | 65.9                           | 10.6 | 15.7  | 7.8 |
| 4                  | 76.0                           | 6.8  | 10.8  | 6.4 |
| 5 <sup>b</sup>     | -                              | -    | -     | -   |
| 6                  | 28.5                           | 28.2 | 37.0  | 6.3 |
| 7                  | 29.2                           | 28.5 | 35.1  | 7.2 |
| 8                  | 30.5                           | 29.4 | 33.6  | 6.5 |
| 9                  | 31.4                           | 27.5 | 35.2  | 5.9 |
| 10                 | 30.9                           | 30.5 | 32.4  | 6.2 |
| 11                 | 32.2                           | 28.5 | 33.9  | 5.4 |
| 12                 | 46.7                           | 25.4 | 21.1  | 6.8 |
| 13                 | 70.0                           | 11.4 | 11.7  | 6.9 |
| 14                 | 53.8                           | 18.3 | 22.8  | 5.1 |
| 15                 | 68.2                           | 11.9 | 12.6  | 7.3 |
| 16                 | 70.2                           | 10.7 | 13.0  | 6.1 |
| 17                 | 60.3                           | 15.9 | 18.0  | 5.8 |
| 18                 | 72.6                           | 10.2 | 10.9  | 6.3 |
| 19                 | 68.5                           | 12.6 | 12.7  | 6.2 |
| 20                 | 59.2                           | 17.6 | 16.2  | 7.0 |
| 21                 | 67.0                           | 18.5 | 9.3   | 5.2 |
| 22                 | 73.0                           | 9.4  | 10.0  | 7.6 |
| 23                 | 79.0                           | 10.1 | 7.7   | 3.2 |

<sup>a</sup> The entry numbers are consistent with those in the main document.

<sup>b</sup> The product is not enough for carrying out NMR characterization due to quite low conversion.
